# Supplementary material for: Aggregation-induced phosphorescence enhancement of Mn-doped ZnS quantum dots: the role of dot-to-dot distance
Source: Royal Society of Chemistry journal article supplement (doi:10.1039/c8nr02151a), 2018-01-01
Supplement: c8nr02151a1.pdf [file c8nr02151a1.pdf]

# Electronic Supplementary Information

## Aggregation-Induced Phosphorescence Enhancement of Mn-Doped ZnS Quantum Dots: the Role of Dot-Dot Distance

Jinyi Zhang,<sup>†</sup> Dandan Tang,<sup>†</sup> Yadong Yao,<sup>‡</sup> Xiandeng Hou<sup>\*,†,‡</sup> and Peng Wu<sup>\*,†,‡</sup>

<sup>†</sup>College of Chemistry, <sup>‡</sup>Analytical & Testing Center, Sichuan University, and <sup>‡</sup>College of Materials Science & Engineering, Chengdu, Sichuan 610064, China

\* Corresponding authors' E-mails: [wupeng@scu.edu.cn](mailto:wupeng@scu.edu.cn), [houxd@scu.edu.cn](mailto:houxid@scu.edu.cn)

|    |                                                                                          |      |
|----|------------------------------------------------------------------------------------------|------|
| 9  | <b>Contents</b>                                                                          |      |
| 10 | <b>1. Experimental Section</b>                                                           |      |
| 11 | <b>1.1. Reagents</b> .....                                                               | S-3  |
| 12 | <b>1.2. Instruments</b> .....                                                            | S-3  |
| 13 | <b>1.3. Synthetic methods</b> .....                                                      | S-3  |
| 14 | <b>2. Characterization of prepared Mn-ZnS QDs</b>                                        |      |
| 15 | <b>2.1. Optical characterization</b> .....                                               | S-6  |
| 16 | <b>2.2. Calculation of phosphorescence and fluorescence lifetime</b> .....               | S-6  |
| 17 | <b>3. Interaction of prepared Mn-ZnS QDs with protamine</b>                              |      |
| 18 | <b>3.1. Particle size analysis of ligand-capped Mn-ZnS QDs with protamine</b> .....      | S-7  |
| 19 | <b>3.2. Spectra and lifetime of ligand-capped Mn-ZnS QDs with protamine</b> .....        | S-8  |
| 20 | <b>4. The approximate distance of dot-dot of TGA and GSH-capped QDs</b> .....            | S-11 |
| 21 | <b>5. Fluorescence and Phosphorescence lifetime parameters of Mn-doped ZnS QDs</b> ..... | S-12 |
| 22 | <b>6. Kinetics of Mn-doped ZnS QDs reactive with protamine</b> .....                     | S-15 |
| 23 | <b>7. Interferences of relevant metal ions and other biomolecules</b> .....              | S-16 |
| 24 | <b>8. Analytical results of protamine in serum samples</b> .....                         | S-17 |
| 25 | <b>9. References</b> .....                                                               | S-17 |

## 26 1. Experimental Section

27 **1.1. Reagents.** Glucose oxidase (GOD), Bovine serum albumin (BSA), Pepsin and Glutathione  
28 (GSH) were purchased commercially from Sigma-Aldrich (Shanghai, China). Poly(ethylene imine)  
29 (PEI) 600, 1800, 10000 and 70000, Insulin and Thioglycolic acid (TGA) were purchased  
30 commercially from Aladin (Shanghai, China).  $\text{ZnAc}_2 \cdot 7\text{H}_2\text{O}$ ,  $\text{MnAc}_2 \cdot 4\text{H}_2\text{O}$ , and  $\text{Na}_2\text{S} \cdot 9\text{H}_2\text{O}$  (Aladin)  
31 and Tris (Sinopharm Chemical Reagent Co., Ltd) were used in this work. Ultra-pure water  
32 (resistance  $>18.2 \text{ M}\Omega\cdot\text{cm}$ ) purified by a purification system (PCUJ-10, Chengdu Pure Technology  
33 Co., Ltd., Chengdu, China), was used for all experiments and making buffers.

34

35 **1.2. Instruments.** Phosphorescence, fluorescence and light-scattering spectra of the prepared Mn-  
36 doped ZnS (Mn-ZnS) quantum dots (QDs) were performed using an F-7000 spectrofluorometer  
37 (Hitachi, Japan) equipped with a plotter unit and a quartz cell ( $1 \text{ cm} \times 1 \text{ cm}$ ). Fluorescence lifetime  
38 and phosphorescence lifetime were measured on a Fluorolog-3 spectrofluorometer (Horiba Jobin  
39 Yvon) with a SpectraLED (280 nm, S-280, Horiba Scientific) and a DeltaDiode (280 nm, D-280,  
40 Horiba Scientific) as the excitation source and a picosecond photon detection module (PPD-850,  
41 Horiba Scientific) as the detector respectively. For instance, the time range was set at 88 ms for  
42 phosphorescence lifetime measurements, and the time range was set at  $1.6 \mu\text{s}$  for fluorescence  
43 lifetime measurements. Absorption spectra were recorded using a UV-1750 UV/Vis  
44 spectrophotometer (Shimadzu, Japan). TEM and HRTEM images of QDs were obtained using a  
45 Tecnai G2 F20 S-TWIN transmission electron microscope at an accelerating voltage of 200 kV  
46 (FEI Co., USA). Dynamic light scattering and Zeta potential measurements of QDs was obtained  
47 using particle size analyzer ZEN3690 (Malvern Instruments Ltd.). Stop-flow fluorescence  
48 spectrum was carried out on Chirascan-plus spectrophotometer (Applied Photophysics Limited,  
49 UK). The luminescence and scattering images of QDs (under UV irradiation 302 nm and green  
50 laser) were taken with a Nikon D300S digital camera.

51

52 **1.3. Synthetic methods.** For the synthesis of Mn-doped ZnS quantum dots (Mn-ZnS QDs) with six  
53 positively charged and four electronegative kinds of ligands is similar to our previous work.<sup>1,2</sup>  
54 Every ligand-capped Mn-ZnS QDs has different synthetic conditions, concrete details as following:

55 **1.3.1. TGA-capped Mn-ZnS QDs.** For preparation of TGA-mediated Mn-ZnS QDs, 45  $\mu\text{L}$  TGA

56 (2 mM), 40  $\mu$ L MnAc<sub>2</sub> (1 mM), 38  $\mu$ L ZnAc<sub>2</sub> (20 mM) and 50  $\mu$ L Tris-HCl solution (pH = 8.0, 0.1  
57 M) were added to 293  $\mu$ L ultrapure water for five minutes in room temperature. Then 34  $\mu$ L Na<sub>2</sub>S  
58 (20 mM) was quickly injected into the precursor solution above followed gently vortexing in room  
59 temperature. Phosphorescent TGA-capped Mn-ZnS QDs were thus obtained.

60

61 **1.3.2. GSH-capped Mn-ZnS QDs.** For preparation of GSH-mediated Mn-ZnS QDs, 30  $\mu$ L GSH (2  
62 mM), 40  $\mu$ L MnAc<sub>2</sub> (1 mM), 38  $\mu$ L ZnAc<sub>2</sub> (20 mM) and 50  $\mu$ L Tris-HCl solution (pH = 7.5, 0.1 M)  
63 were added to 308  $\mu$ L ultrapure water for five minutes in room temperature. Then 34  $\mu$ L Na<sub>2</sub>S (20  
64 mM) was quickly injected into the precursor solution above followed gently vortexing in room  
65 temperature. Phosphorescent GSH-capped Mn-ZnS QDs were thus obtained.

66

67 **1.3.3. Insulin-capped Mn-ZnS QDs.** For preparation of insulin-mediated Mn-ZnS QDs, 40  $\mu$ L  
68 insulin (0.1 mM), 40  $\mu$ L MnAc<sub>2</sub> (1 mM), 38  $\mu$ L ZnAc<sub>2</sub> (20 mM) and 50  $\mu$ L Tris-HCl solution (pH  
69 = 7.5, 0.1 M) were added to 298  $\mu$ L ultrapure water for five minutes in room temperature. Then 34  
70  $\mu$ L Na<sub>2</sub>S (20 mM) was quickly injected into the precursor solution above followed gently vortexing  
71 in room temperature. Phosphorescent insulin-capped Mn-ZnS QDs were thus obtained.

72

73 **1.3.4. Pepsin-capped Mn-ZnS QDs.** For preparation of pepsin-mediated Mn-ZnS QDs, 70  $\mu$ L  
74 pepsin (5 mg mL<sup>-1</sup>), 40  $\mu$ L MnAc<sub>2</sub> (1 mM), 38  $\mu$ L ZnAc<sub>2</sub> (20 mM) and 50  $\mu$ L Tris-HCl solution  
75 (pH = 7.5, 0.1 M) were added to 268  $\mu$ L ultrapure water for five minutes in room temperature. Then  
76 34  $\mu$ L Na<sub>2</sub>S (20 mM) was quickly injected into the precursor solution above followed gently  
77 vortexing in room temperature. Phosphorescent pepsin-capped Mn-ZnS QDs were thus obtained.

78

79 **1.3.5. BSA-capped Mn-ZnS QDs.** For preparation of BSA-mediated Mn-ZnS QDs, 40  $\mu$ L BSA  
80 (10 mg mL<sup>-1</sup>), 40  $\mu$ L MnAc<sub>2</sub> (1 mM), 38  $\mu$ L ZnAc<sub>2</sub> (20 mM) and 50  $\mu$ L Tris-HCl solution (pH =  
81 7.0, 0.1 M) were added to 298  $\mu$ L ultrapure water for five minutes in room temperature. Then 34  
82  $\mu$ L Na<sub>2</sub>S (20 mM) was quickly injected into the precursor solution above followed gently vortexing  
83 in room temperature. Phosphorescent BSA-capped Mn-ZnS QDs were thus obtained.

84

85 **1.3.6. GOD-capped Mn-ZnS QDs.** For preparation of GOD-mediated Mn-ZnS QDs, 30  $\mu$ L GOD

(10 mg mL<sup>-1</sup>), 40 µL MnAc<sub>2</sub> (1 mM), 38 µL ZnAc<sub>2</sub> (20 mM) and 50 µL Tris-HCl solution (pH = 6.5, 0.1 M) were added to 308 µL ultrapure water for five minutes in room temperature. Then 34 µL Na<sub>2</sub>S (20 mM) was quickly injected into the precursor solution above followed gently vortexing in room temperature. Phosphorescent GOD-capped Mn-ZnS QDs were thus obtained.

90

**1.3.7. PEI600-capped Mn-ZnS QDs.** For preparation of PEI600-mediated Mn-ZnS QDs, 45 µL PEI600 (0.5 mM), 40 µL MnAc<sub>2</sub> (1 mM), 38 µL ZnAc<sub>2</sub> (20 mM) and 50 µL Tris-HCl solution (pH = 6.5, 0.1 M) were added to 293 µL ultrapure water for five minutes in room temperature. Then 34 µL Na<sub>2</sub>S (20 mM) was quickly injected into the precursor solution above followed gently vortexing in room temperature. Phosphorescent PEI600-capped Mn-ZnS QDs were thus obtained.

96

**1.3.8. PEI1800-capped Mn-ZnS QDs.** For preparation of PEI1800-mediated Mn-ZnS QDs, 45 µL PEI1800 (0.2 mM), 40 µL MnAc<sub>2</sub> (1 mM), 38 µL ZnAc<sub>2</sub> (20 mM) and 50 µL Tris-HCl solution (pH = 6.5, 0.1 M) were added to 293 µL ultrapure water for five minutes in room temperature. Then 34 µL Na<sub>2</sub>S (20 mM) was quickly injected into the precursor solution above followed gently vortexing in room temperature. Phosphorescent PEI1800-capped Mn-ZnS QDs were thus obtained.

102

**1.3.9. PEI10000-capped Mn-ZnS QDs.** For preparation of PEI10000-mediated Mn-ZnS QDs, 50 µL PEI10000 (0.2 mM), 40 µL MnAc<sub>2</sub> (1 mM), 38 µL ZnAc<sub>2</sub> (20 mM) and 50 µL Tris-HCl solution (pH = 6.5, 0.1 M) were added to 288 µL ultrapure water for five minutes in room temperature. Then 34 µL Na<sub>2</sub>S (20 mM) was quickly injected into the precursor solution above followed gently vortexing in room temperature. Phosphorescent PEI10000-capped Mn-ZnS QDs were thus obtained.

109

**1.3.10. PEI70000-capped Mn-ZnS QDs.** For preparation of PEI70000-mediated Mn-ZnS QDs, 35 µL PEI70000 (0.2 mM), 40 µL MnAc<sub>2</sub> (1 mM), 38 µL ZnAc<sub>2</sub> (20 mM) and 50 µL Tris-HCl solution (pH = 6.5, 0.1 M) were added to 313 µL ultrapure water for five minutes in room temperature. Then 34 µL Na<sub>2</sub>S (20 mM) was quickly injected into the precursor solution above followed gently vortexing in room temperature. Phosphorescent PEI70000-capped Mn-ZnS QDs were thus obtained.

## 116 2. Characterization of prepared Mn-ZnS QDs

### 117 2.1. Optical characterization

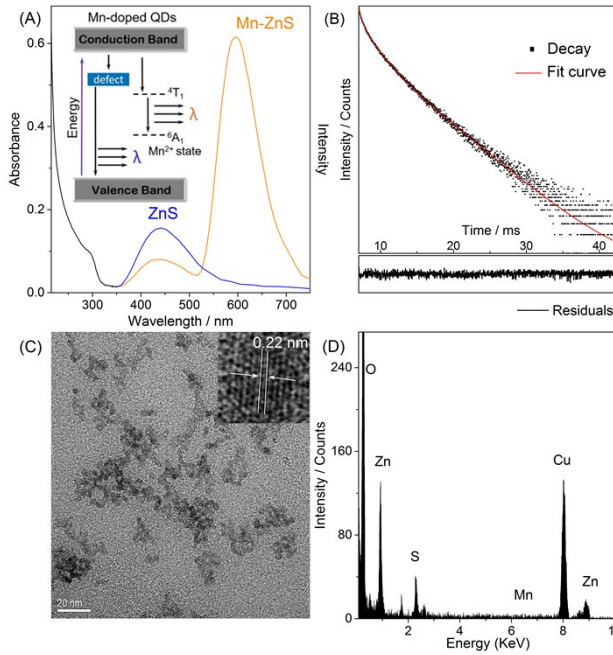

118

119 **Figure S1.** Characterization of the as-prepared Mn-ZnS QDs with 5% Mn<sup>2+</sup>: (A) UV-vis absorption  
 120 spectra (black line), fluorescence emission spectra (orange line) of Mn-ZnS QDs, and fluorescence  
 121 emission spectra (blue line) of ZnS QDs (Ex: 290 nm), the inset is electronic transitions involved in the  
 122 short and long lived emission of Mn-ZnS QDs; (B) phosphorescence decay curve of GSH-Mn-ZnS QDs;  
 123 (C) TEM image of the Mn-doped ZnS QDs, with a high-magnification TEM image shown in the inset; and  
 124 (D) the EDX of the Mn-doped ZnS QDs.

125 **2.1. Calculation of phosphorescence and fluorescence lifetime.** Phosphorescence and  
 126 fluorescence lifetime measurements were performed on a Fluorolog-3 spectrofluorometer (Horiba  
 127 Jobin Yvon) with SpectraLED (280 nm, S-280, Horiba Scientific) and DeltaDiode (280 nm, D-280,  
 128 Horiba Scientific) as the excitation source respectively and a picosecond photon detection module  
 129 (PPD-850, Horiba Scientific) as the detector. The Phosphorescence and fluorescence time range  
 130 were set at 44 ms and 1.6  $\mu$ s respectively. The average lifetime was calculated using the equation  
 131 below:

$$132 \quad \tau = \sum f_i \tau_i = f_1 \tau_1 + f_2 \tau_2 + f_3 \tau_3 \quad (1)$$

133 Where  $\tau_i$  is the lifetime and  $f_i$  is the contribution factor of  $\tau_i$  to  $\tau$ , which can be collected from the  
 134 phosphorescence lifetime measurements after proper fitting. Here, the data are then fitted with the  
 135 third order exponential decay.

136

### 137 3. Interaction of prepared Mn-ZnS QDs with protamine

#### 138 3.1. Particle size analysis of ligand-capped Mn-ZnS QDs with protamine

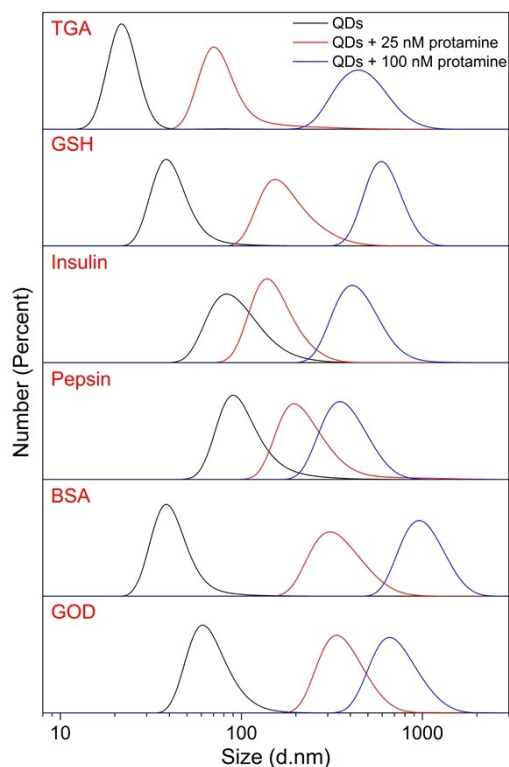

139

140 **Figure S2** Dynamic light scattering (DLS) analysis of the prepared several ligands-capped Mn-ZnS QDs  
 141 with different concentration of protamine. The reactive solutions were prepared in 0.01 M Tris-HCl buffer  
 142 of pH 9.0.

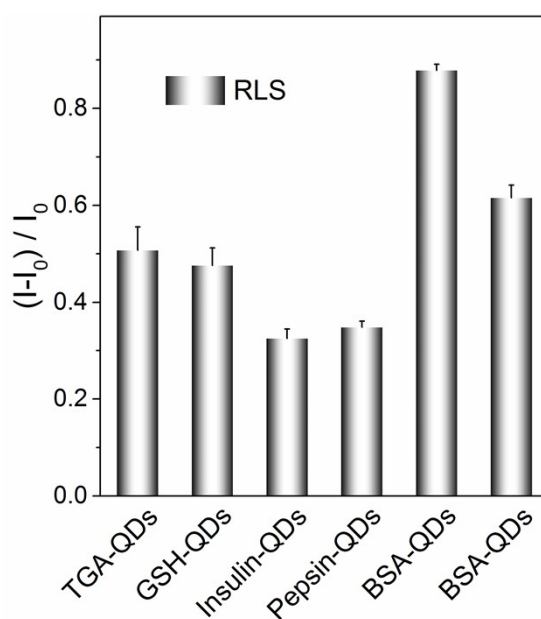

143

144 **Figure S3** Increased resonant light scattering (RLS) of the prepared several ligands-capped Mn-ZnS  
 145 QDs with protamine.

146 **3.2. Luminescence, light-scattering and UV-Vis absorption spectra and lifetime of ligand-**  
147 **capped Mn-ZnS QDs with protamine**

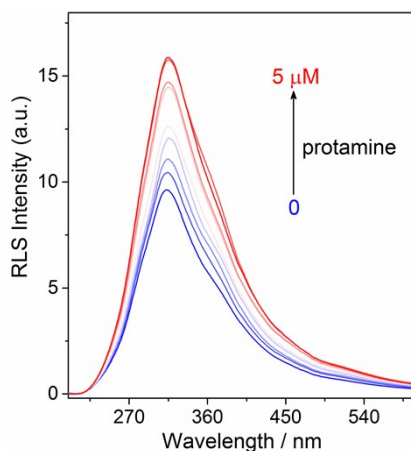

148  
149 **Figure S4** Light-scattering spectra of TGA-capped Mn-doped ZnS QDs in the presence of various  
150 concentrations of protamine.

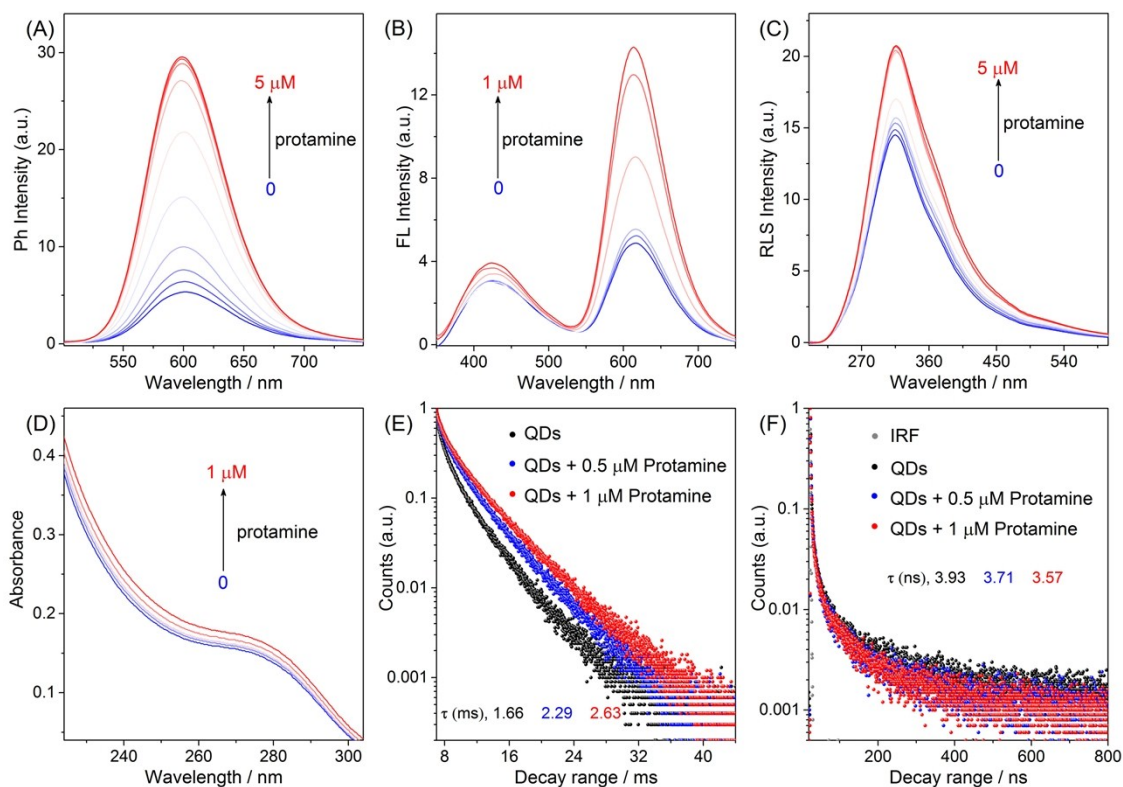

151  
152 **Figure S5** (A) Phosphorescence, (B) fluorescence, (C) light-scattering and (D) UV-Vis absorption spectra,  
153 (E) phosphorescence and (F) fluorescence lifetime of GSH-capped Mn-doped ZnS QDs in the presence  
154 of various concentrations of protamine.



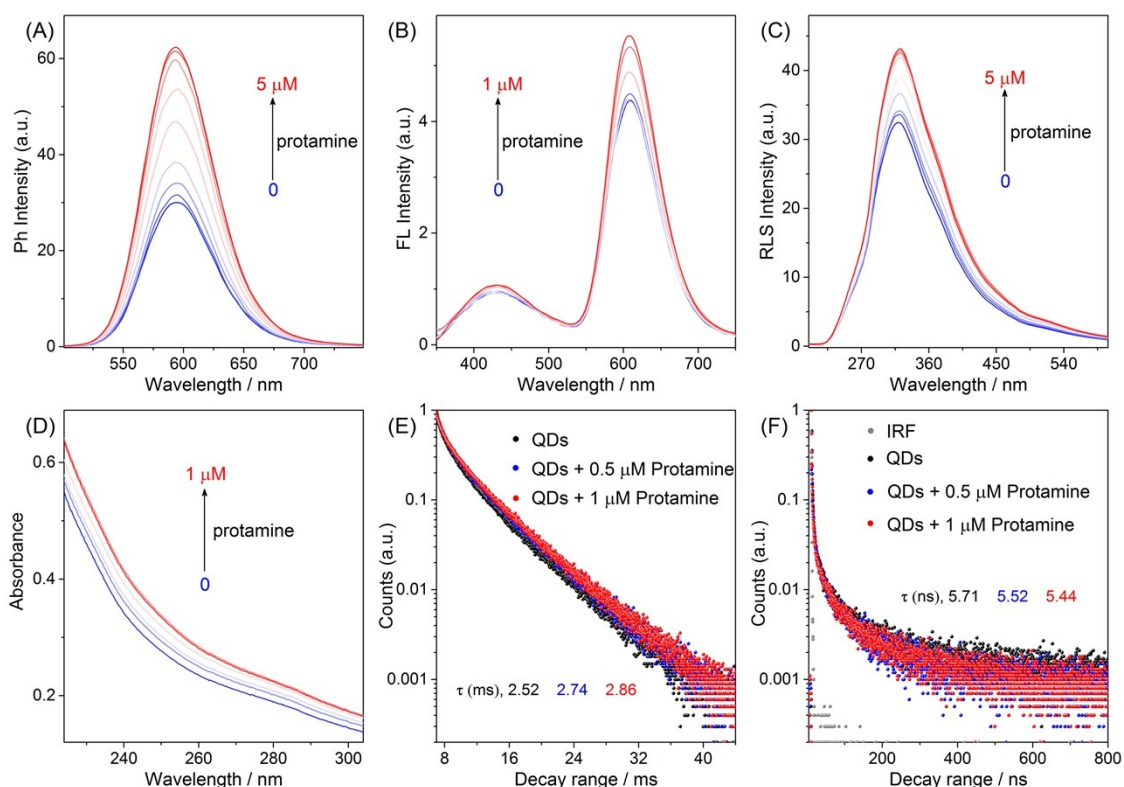

155  
 156 **Figure S6** (A) Phosphorescence, (B) fluorescence, (C) light-scattering and (D) UV-Vis absorption spectra,  
 157 (E) phosphorescence and (F) fluorescence lifetime of Insulin-capped Mn-doped ZnS QDs in the presence  
 158 of various concentrations of protamine.

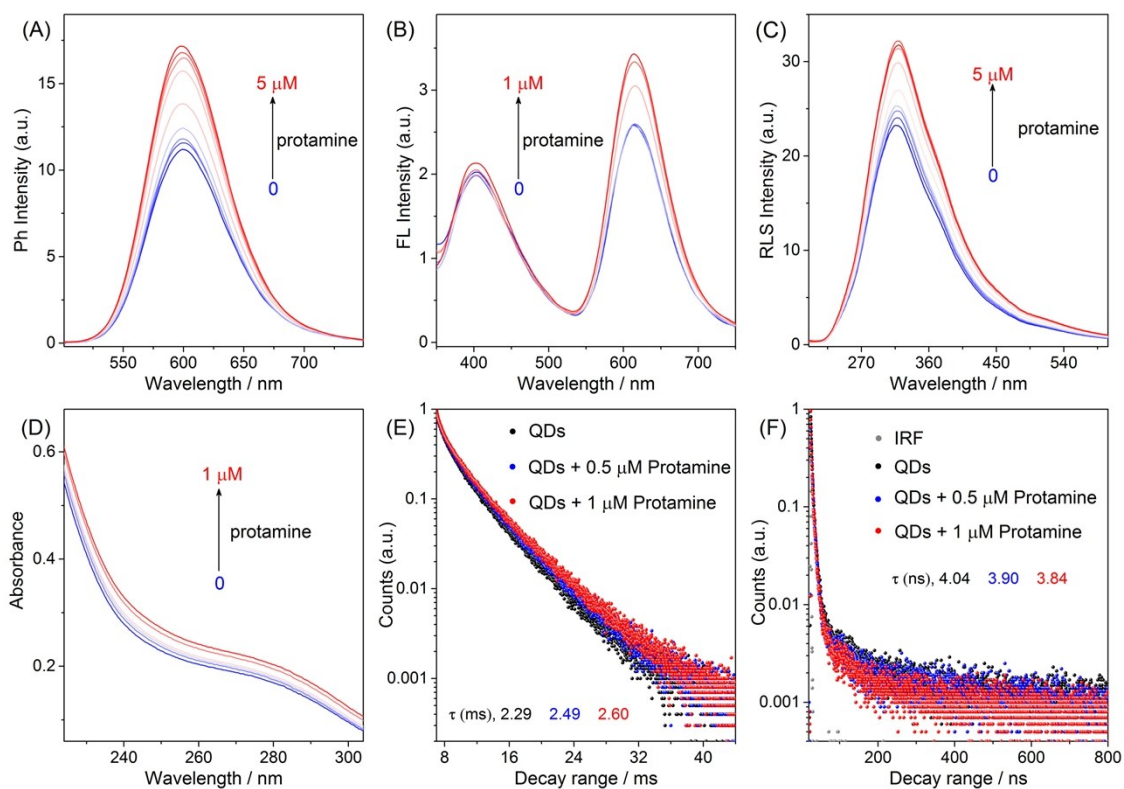

159  
 160 **Figure S7** (A) Phosphorescence, (B) fluorescence, (C) light-scattering and (D) UV-Vis absorption spectra,  
 161 (E) phosphorescence and (F) fluorescence lifetime of Pepsin-capped Mn-doped ZnS QDs in the

162 presence of various concentrations of protamine.

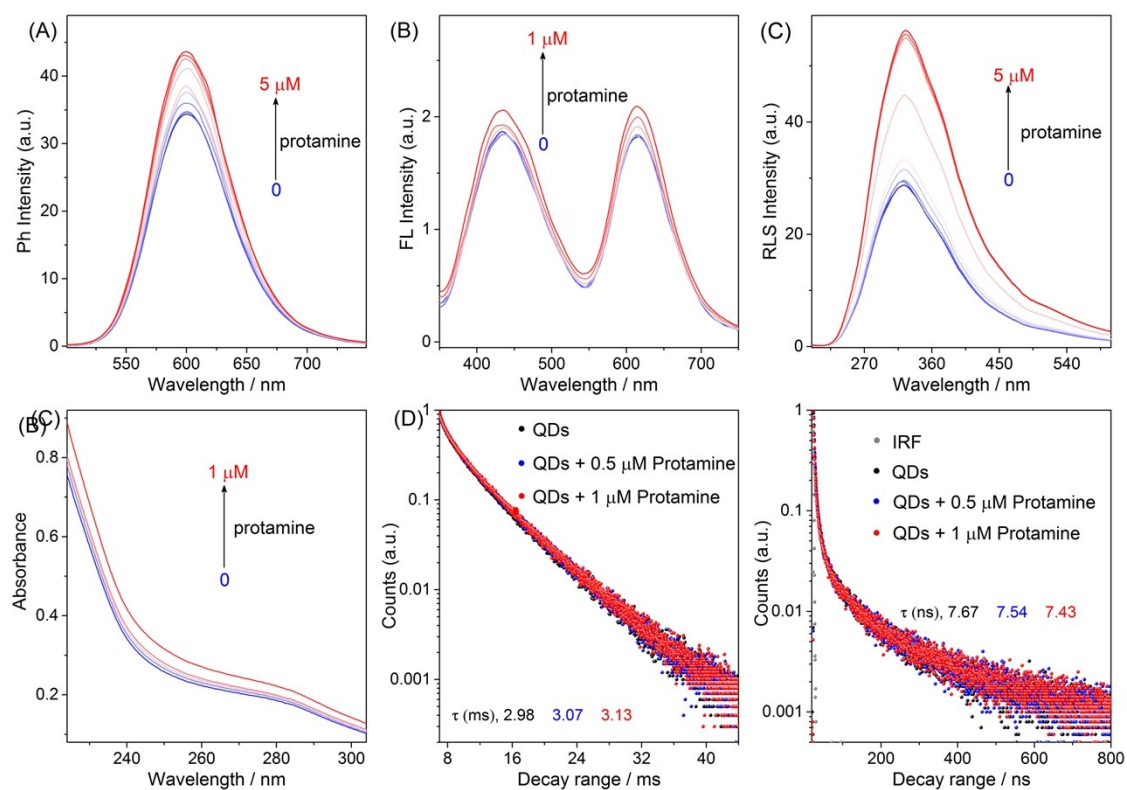

163  
164 **Figure S8** (A) Phosphorescence, (B) fluorescence, (C) light-scattering and (D) UV-Vis absorption spectra,  
165 (E) phosphorescence and (F) fluorescence lifetime of BSA-capped Mn-doped ZnS QDs in the presence  
166 of various concentrations of protamine.

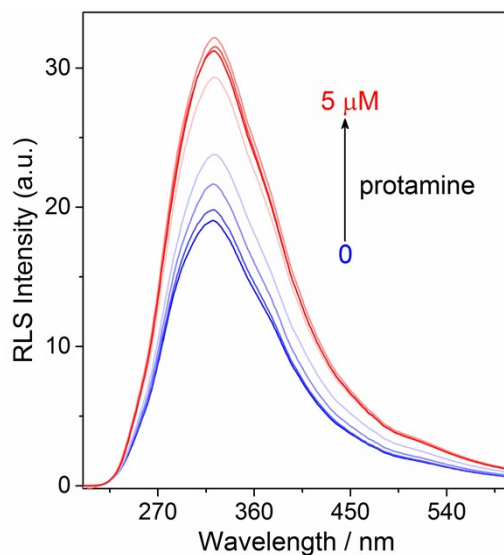

167  
168 **Figure S9** Light-scattering spectra of GOD-capped Mn-doped ZnS QDs in the presence of various  
169 concentrations of protamine.

171 **4. The approximate distance of dot-dot of TGA and GSH-capped QDs**

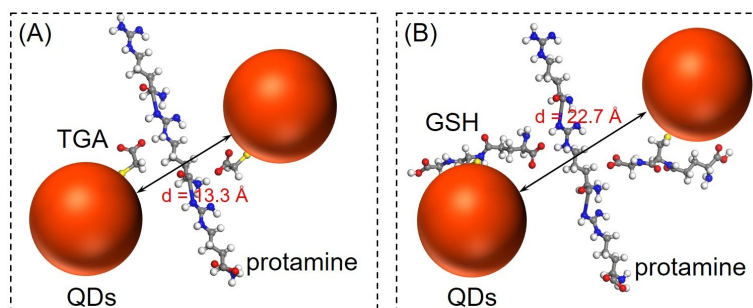

172  
173 **Figure S10** The approximate distance of dot-dot of (A) TGA and (B) GSH-capped QDs by numerical  
174 simulation respectively.

175 **5. Fluorescence and Phosphorescence lifetime parameters of Mn-doped ZnS QDs**

| Table S1. Luminescence lifetime parameters of Mn-doped ZnS QDs                   |                              |       |                         |          |                      |       |                         |          |                              |       |                         |          |                      |       |                         |          |
|----------------------------------------------------------------------------------|------------------------------|-------|-------------------------|----------|----------------------|-------|-------------------------|----------|------------------------------|-------|-------------------------|----------|----------------------|-------|-------------------------|----------|
| Sample                                                                           | TGA-capped Mn-doped ZnS QDs  |       |                         |          |                      |       |                         |          | GOD-capped Mn-doped ZnS QDs  |       |                         |          |                      |       |                         |          |
|                                                                                  | Defect-related emission (ns) |       |                         |          | Dopant emission (ms) |       |                         |          | Defect-related emission (ns) |       |                         |          | Dopant emission (ms) |       |                         |          |
|                                                                                  | $\tau_i$                     | $f_i$ | $\tau_{\text{average}}$ | $\chi^2$ | $\tau_i$             | $f_i$ | $\tau_{\text{average}}$ | $\chi^2$ | $\tau_i$                     | $f_i$ | $\tau_{\text{average}}$ | $\chi^2$ | $\tau_i$             | $f_i$ | $\tau_{\text{average}}$ | $\chi^2$ |
| QDs                                                                              | 0.98                         | 0.76  | 2.34                    | 1.06     | 0.05                 | 0.36  | 1.20                    | 1.35     | 2.05                         | 0.87  | 8.67                    | 1.27     | 0.42                 | 0.25  | 2.88                    | 1.16     |
|                                                                                  | 4.55                         | 0.19  |                         |          | 0.98                 | 0.40  |                         |          | 18.18                        | 0.11  |                         |          | 2.21                 | 0.39  |                         |          |
|                                                                                  | 14.62                        | 0.05  |                         |          | 3.28                 | 0.24  |                         |          | 171.4                        | 0.02  |                         |          | 5.37                 | 0.36  |                         |          |
| QDs + 0.5 $\mu\text{M}$ protamine                                                | 0.86                         | 0.82  | 1.89                    | 1.16     | 0.30                 | 0.27  | 2.06                    | 1.13     | 2.48                         | 0.87  | 8.28                    | 1.38     | 0.33                 | 0.23  | 2.92                    | 1.14     |
|                                                                                  | 4.60                         | 0.14  |                         |          | 1.66                 | 0.46  |                         |          | 21.11                        | 0.10  |                         |          | 2.10                 | 0.40  |                         |          |
|                                                                                  | 14.77                        | 0.04  |                         |          | 4.47                 | 0.27  |                         |          | 169.2                        | 0.03  |                         |          | 5.39                 | 0.37  |                         |          |
| QDs + 1 $\mu\text{M}$ protamine                                                  | 0.84                         | 0.87  | 1.56                    | 1.14     | 0.33                 | 0.25  | 2.52                    | 1.21     | 2.37                         | 0.86  | 8.13                    | 1.27     | 0.35                 | 0.24  | 2.97                    | 1.14     |
|                                                                                  | 4.34                         | 0.11  |                         |          | 1.99                 | 0.43  |                         |          | 18.95                        | 0.11  |                         |          | 2.22                 | 0.39  |                         |          |
|                                                                                  | 14.45                        | 0.02  |                         |          | 4.95                 | 0.32  |                         |          | 150.4                        | 0.03  |                         |          | 5.47                 | 0.37  |                         |          |
| $\tau_{\text{average}} = \sum f_i \tau_i = f_1 \tau_1 + f_2 \tau_2 + f_3 \tau_3$ |                              |       |                         |          |                      |       |                         |          |                              |       |                         |          |                      |       |                         |          |

| Table S2. Parameters of TGA-capped Mn-doped ZnS QDs                              |                              |       |                         |          |                      |       |                         |          |
|----------------------------------------------------------------------------------|------------------------------|-------|-------------------------|----------|----------------------|-------|-------------------------|----------|
| Sample                                                                           | Defect-related emission (ns) |       |                         |          | Dopant emission (ms) |       |                         |          |
|                                                                                  | $\tau_i$                     | $f_i$ | $\tau_{\text{average}}$ | $\chi^2$ | $\tau_i$             | $f_i$ | $\tau_{\text{average}}$ | $\chi^2$ |
| QDs                                                                              | 0.98                         | 0.76  | 2.34                    | 1.06     | 0.05                 | 0.36  | 1.20                    | 1.35     |
|                                                                                  | 4.55                         | 0.19  |                         |          | 0.98                 | 0.40  |                         |          |
|                                                                                  | 14.62                        | 0.05  |                         |          | 3.28                 | 0.24  |                         |          |
| QDs +<br>protamine                                                               | 0.83                         | 0.87  | 1.54                    | 1.13     | 0.44                 | 0.25  | 2.61                    | 1.11     |
|                                                                                  | 4.28                         | 0.10  |                         |          | 2.09                 | 0.42  |                         |          |
|                                                                                  | 15.38                        | 0.03  |                         |          | 4.92                 | 0.33  |                         |          |
| QDs + Zn <sup>2+</sup>                                                           | 0.93                         | 0.89  | 1.61                    | 1.28     | 0.11                 | 0.28  | 1.89                    | 1.34     |
|                                                                                  | 4.87                         | 0.10  |                         |          | 1.35                 | 0.43  |                         |          |
|                                                                                  | 17.48                        | 0.01  |                         |          | 4.35                 | 0.29  |                         |          |
| QDs + Zn <sup>2+</sup><br>+ protamine                                            | 0.92                         | 0.88  | 1.58                    | 1.19     | 0.42                 | 0.24  | 2.70                    | 1.09     |
|                                                                                  | 4.28                         | 0.10  |                         |          | 2.18                 | 0.45  |                         |          |
|                                                                                  | 15.41                        | 0.02  |                         |          | 5.12                 | 0.31  |                         |          |
| QDs + S <sup>2-</sup>                                                            | 0.83                         | 0.82  | 1.87                    | 1.14     | 0.07                 | 0.45  | 0.60                    | 1.34     |
|                                                                                  | 3.80                         | 0.12  |                         |          | 0.64                 | 0.41  |                         |          |
|                                                                                  | 12.68                        | 0.06  |                         |          | 2.26                 | 0.14  |                         |          |
| QDs + S <sup>2-</sup> +<br>protamine                                             | 0.76                         | 0.85  | 1.50                    | 1.22     | 0.27                 | 0.34  | 1.52                    | 1.13     |
|                                                                                  | 3.49                         | 0.11  |                         |          | 1.34                 | 0.44  |                         |          |
|                                                                                  | 12.15                        | 0.04  |                         |          | 3.86                 | 0.22  |                         |          |
| $\tau_{\text{average}} = \sum f_i \tau_i = f_1 \tau_1 + f_2 \tau_2 + f_3 \tau_3$ |                              |       |                         |          |                      |       |                         |          |

177

178

179

180

181

182

| Table S3. Parameters of GOD-capped Mn-doped ZnS QDs                              |                              |       |                         |          |                      |       |                         |          |
|----------------------------------------------------------------------------------|------------------------------|-------|-------------------------|----------|----------------------|-------|-------------------------|----------|
| Sample                                                                           | Defect-related emission (ns) |       |                         |          | Dopant emission (ms) |       |                         |          |
|                                                                                  | $\tau_i$                     | $f_i$ | $\tau_{\text{average}}$ | $\chi^2$ | $\tau_i$             | $f_i$ | $\tau_{\text{average}}$ | $\chi^2$ |
| QDs                                                                              | 2.47                         | 0.87  | 8.26                    | 1.40     | 0.43                 | 0.25  | 2.88                    | 1.16     |
|                                                                                  | 20.83                        | 0.10  |                         |          | 2.21                 | 0.40  |                         |          |
|                                                                                  | 167.9                        | 0.03  |                         |          | 4.26                 | 0.35  |                         |          |
| QDs +<br>protamine                                                               | 2.38                         | 0.86  | 8.17                    | 1.28     | 0.36                 | 0.23  | 2.94                    | 1.15     |
|                                                                                  | 19.35                        | 0.11  |                         |          | 2.23                 | 0.42  |                         |          |
|                                                                                  | 153.4                        | 0.03  |                         |          | 5.50                 | 0.35  |                         |          |
| QDs + Zn <sup>2+</sup>                                                           | 2.08                         | 0.87  | 8.76                    | 1.28     | 0.35                 | 0.23  | 3.02                    | 1.08     |
|                                                                                  | 19.20                        | 0.10  |                         |          | 2.27                 | 0.41  |                         |          |
|                                                                                  | 177.5                        | 0.03  |                         |          | 5.55                 | 0.36  |                         |          |
| QDs + Zn <sup>2+</sup><br>+ protamine                                            | 2.11                         | 0.86  | 9.15                    | 1.23     | 0.42                 | 0.24  | 3.05                    | 1.14     |
|                                                                                  | 19.46                        | 0.11  |                         |          | 2.36                 | 0.40  |                         |          |
|                                                                                  | 175.0                        | 0.03  |                         |          | 5.56                 | 0.36  |                         |          |
| QDs + S <sup>2-</sup>                                                            | 2.57                         | 0.90  | 7.35                    | 1.43     | 0.05                 | 0.30  | 2.38                    | 1.29     |
|                                                                                  | 23.12                        | 0.09  |                         |          | 1.50                 | 0.34  |                         |          |
|                                                                                  | 166.9                        | 0.01  |                         |          | 5.12                 | 0.36  |                         |          |
| QDs + S <sup>2-</sup> +<br>protamine                                             | 2.32                         | 0.90  | 6.51                    | 1.34     | 0.06                 | 0.28  | 2.45                    | 1.20     |
|                                                                                  | 20.65                        | 0.09  |                         |          | 1.51                 | 0.34  |                         |          |
|                                                                                  | 163.2                        | 0.01  |                         |          | 5.08                 | 0.38  |                         |          |
| $\tau_{\text{average}} = \sum f_i \tau_i = f_1 \tau_1 + f_2 \tau_2 + f_3 \tau_3$ |                              |       |                         |          |                      |       |                         |          |

## 185 6. Kinetics of Mn-doped ZnS QDs reactive with protamine

186 Stopped-flow measurements were performed with a stopped-flow CS/SF module coupled to  
187 Applied Photophysics fluorescence detector. In a standard experimental setup, the solution of QDs  
188 was placed in Syringe 1, while Syringe 2 contained protamine at different concentrations.  
189 Fluorescence measurements were initiated by mixing the contents of the two syringes in equal  
190 volumes (total volume = 200  $\mu$ L) in a stopped-flow chamber. All experiments were carried out in  
191 10 mM Tris-HCl buffer, pH 7.0, at 25  $^{\circ}$ C. Fluorescence intensities were recorded with an excitation  
192 wavelength of 290 nm and emission at 600 nm. For each experiment, measurements from 7 to 13  
193 injections were accumulated and the average of these traces were used for data analysis. To ensure  
194 reproducibility, each experiment was repeated at least three times.

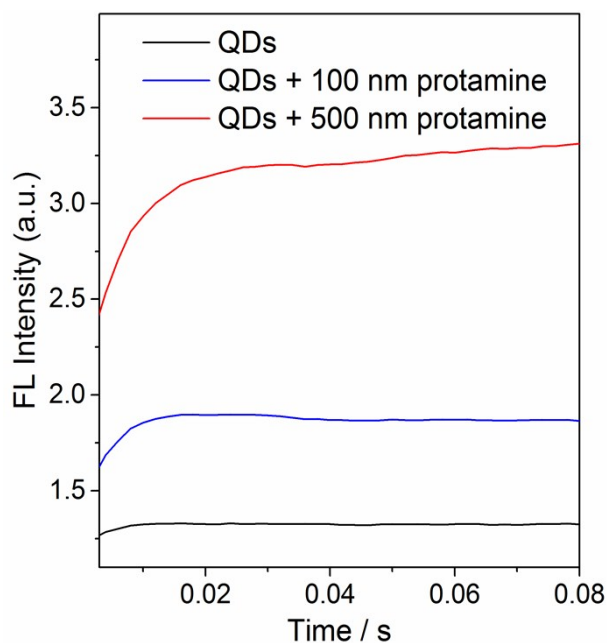

195

196 **Figure S11** Kinetics of Mn-doped ZnS QDs reactive with protamine, monitored by stopped-flow  
197 experiments. The reactive solutions were prepared in 0.01 M Tris-HCl buffer of pH 9.0.

199 **7. Interferences of relevant metal ions and other biomolecules**

200 **Table S4** Effect of co-existing substances on the quenched RTP intensity of Mn-doped  
 201 ZnS QDs by 100 nM protamine.

| Existing substances      | Concentration | Changed RTP intensity (%) |
|--------------------------|---------------|---------------------------|
| HSA                      | 100 $\mu$ M   | -4.0                      |
| Glucose                  | 1 mM          | -0.7                      |
| L-cysteine               | 1 $\mu$ M     | -7.4                      |
| GSH                      | 1 $\mu$ M     | -4.0                      |
| Ascorbic acid            | 1 $\mu$ M     | -6.4                      |
| Dopamine                 | 5 $\mu$ M     | -7.3                      |
| Amantadine Hydrochloride | 20 $\mu$ M    | -3.9                      |
| Acetylcholine            | 50 $\mu$ M    | -6.1                      |
| Phenylalanine            | 100 $\mu$ M   | -5.0                      |
| Alanine                  | 100 $\mu$ M   | 0.6                       |
| Glycine                  | 100 $\mu$ M   | -0.5                      |
| Glutamic acid            | 100 $\mu$ M   | -1.9                      |
| Arginine                 | 100 $\mu$ M   | 5.2                       |
| Lysine                   | 100 $\mu$ M   | 4.5                       |
| Proline                  | 100 $\mu$ M   | -5.6                      |
| Valine                   | 100 $\mu$ M   | -2.4                      |
| Histidine                | 20 $\mu$ M    | -5.6                      |
| Ca <sup>2+</sup>         | 100 $\mu$ M   | 3.7                       |
| Cu <sup>2+</sup>         | 100 nM        | -8.4                      |
| Fe <sup>3+</sup>         | 100 nM        | -7.3                      |
| K <sup>+</sup>           | 1 mM          | -2.2                      |
| Mg <sup>2+</sup>         | 50 $\mu$ M    | 4.4                       |
| Mn <sup>2+</sup>         | 200 nM        | -5.9                      |
| Na <sup>+</sup>          | 1 mM          | -5.6                      |
| Zn <sup>2+</sup>         | 2 $\mu$ M     | 1.3                       |

202



## 203 8. Analytical results of protamine in serum samples

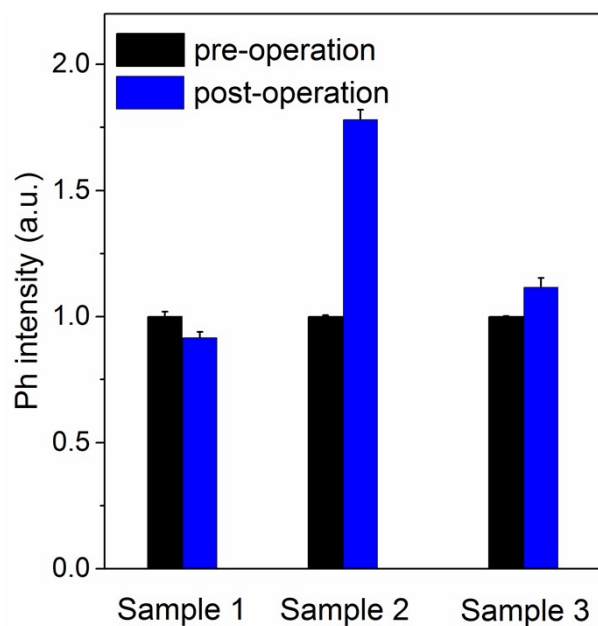

204

205 **Figure S12** Analytical results of protamine in serum samples of pre-operation and post-operation of  
206 cardiovascular patients. The phosphorescence intensity of QDs with 1% serum of pre-operation is  
207 normalized to 1 for the calculation in all cases. The reactive solutions were prepared in 0.01 M Tris-HCl  
208 buffer of pH 9.0.

## 209 9. References

210 (1) Wu, P.; Zhang, J.; Wang, S.; Zhu, A.; Hou, X. *Chem. Eur. J.* **2014**, *20*, 952-956.

211 (2) Zhang, J.; Zhu, A.; Zhao, T.; Wu, L.; Wu, P.; Hou, X. *J. Mater. Chem. B* **2015**, *3*, 5942-5950.

212
